# Supplementary material
Source: publisher figshare collection journal article supplement (https://acs.figshare.com/ndownloader/files/3907399)
Supplement: Supplementary file 1 [file 3907399]

# Understanding the Role of Few-layer Graphene Nanosheets In Enhancing the Hydrogen Sorption Kinetics of Magnesium Hydride

*Guang Liu<sup>b</sup>, Yijing Wang<sup>a,\*</sup>, Lifang Jiao<sup>a</sup>, Huatang Yuan<sup>a</sup>*

<sup>a</sup> Institute of New Energy Material Chemistry, The Co-Innovation Center of Chemistry and Chemical Engineering of Tianjin, Key Laboratory of Advanced Energy Materials Chemistry (MOE), Tianjin Key Lab on Metal and Molecule-based Material Chemistry, Nankai University, Tianjin 300071, P. R. China

<sup>b</sup> Research Institute of Special Chemicals, Taiyuan University of Technology, Taiyuan 030024, Shanxi, P. R. China

\*Corresponding Author: wangyj@nankai.edu.cn (Y.J. Wang)

Table S1. Different reaction models consistent with Avrami exponent  $n \approx 1^{1-2}$ .

| Model equation                              | Description                                                                            |
|---------------------------------------------|----------------------------------------------------------------------------------------|
| $\alpha = kt$                               | Surface controlled (chemisorption)                                                     |
| $1 - (2\alpha/3) - (1 - \alpha)^{2/3} = kt$ | Contracting volume, 3-d growth diffusion controlled with decreasing interface velocity |
| $1 - (1 - \alpha)^{1/2} = kt$               | Contracting volume, 2-d growth with constant interface velocity                        |
| $1 - (1 - \alpha)^{1/3} = kt$               | Contracting volume, 3-d growth with constant interface velocity                        |
| $-\ln(1 - \alpha) = kt$                     | Mampel equation (random nucleation approach)                                           |

Table S2. Grain size of MgH<sub>2</sub>-5GNS and MgH<sub>2</sub> samples before and after cycling.

| Sample                 | Crystallite size (nm) |               |
|------------------------|-----------------------|---------------|
|                        | Before cycling        | After cycling |
| MgH <sub>2</sub> -5GNS | 7.3                   | 19.5          |
| MgH <sub>2</sub>       | 10.8                  | 32            |

### Notes on calibration and conversion of TPD intensity to weight of hydrogen:

Before the TPD intensity calibrating, the calibration factor is necessary. Generally, the calibration was performed by using a 35.1 mL min<sup>-1</sup> high-purity hydrogen (99.999%) flow rate and 5 °C/min heating rate. The calibration factor can be obtained from the equation as follow:

$$C_f = \frac{A(t)}{I(t)} \times F_{H_2} \quad (1)$$

Where  $C_f$  is the calibration factor,  $A(t)$  is the peak area at time  $t$ ,  $I(t)$  is the peak intensity at time  $t$  and  $F_{H_2}$  is the hydrogen flow rate.

Then the TPD performance of composites were measured by the same flow rate ( $H_2$  was replaced by Ar) and heating rate as the process of calibration. Because there was only  $H_2$  released during the decomposition process, the weight of hydrogen can be calculated from TPD curve by the follow equation:

$$wt\% = \left[ \frac{A_{peak}}{C_f} \times \frac{M_{H_2} PV}{RT} \right] / m \quad (2)$$

Here, wt% is the hydrogen weight,  $A_{peak}$  is the peak area of desorption,  $M_{H_2}$  is molecular of  $H_2$ ,  $P$  is pressure,  $V$  is the volume of six-way valve,  $R$  is the gas constant,  $T$  is the temperature and  $m$  is the weight of the composites.

### References:

1. Jeon, K.-J.; Moon, H. R.; Ruminski, A. M.; Jiang, B.; Kisielowski, C.; Bardhan, R.; Urban, J. J., Air-stable magnesium nanocomposites provide rapid and high-capacity hydrogen storage without using heavy-metal catalysts. *Nat. Mater.* **2011**, *10*, 286-290.
2. Mao, J. F.; Guo, Z. P.; Yu, X. B.; Liu, H. K.; Wu, Z.; Ni, J., Enhanced hydrogen sorption properties of Ni and Co-catalyzed MgH<sub>2</sub>. *Int. J. Hydrogen Energy* **2010**, *35*, 4569-4575.
